# Supplementary material for: Widespread DNA hypomethylation and differential gene expression in Turner syndrome
Source: PubMed Central journal article supplement (PMC5043230; doi:10.1038/srep34220), 2016-09-30
Supplement: srep34220-s1.pdf [file srep34220-s1.pdf]

## Widespread DNA hypomethylation and differential gene expression in Turner syndrome

Christian Trolle, MD<sup>a,c</sup>; Morten Muhlig Nielsen, MSc, PhD<sup>c</sup>; Anne Skakkebæk MD, PhD<sup>b</sup>; Philippe Lamy, MSc<sup>c</sup>, PhD<sup>c</sup>; Søren Vang, MSc<sup>c</sup>, PhD<sup>c</sup>; Jakob Hedegaard, MSc<sup>c</sup>, PhD<sup>c</sup>; Iver Nordentoft, MSc<sup>c</sup>, PhD<sup>c</sup>; Torben Falck Ørntoft, MD, PhD, DMsc<sup>c</sup>; Jakob Skou Pedersen. MSc, PhD<sup>c,d</sup>; Claus Højbjerg Gravholt, MD, PhD DMsc<sup>a,c</sup>.

*<sup>a</sup>Department of Endocrinology and Internal Medicine and Medical Research Laboratories, Aarhus University Hospital, Aarhus, Denmark; <sup>b</sup>Department of Clinical Genetics, Aarhus University Hospital, Aarhus, Denmark; <sup>c</sup>Department of Molecular Medicine, Aarhus University Hospital, Aarhus, Denmark. <sup>d</sup>Bioinformatics Research Centre, Aarhus University, Aarhus, Denmark.*

Corresponding author: Christian Trolle, MD, Department of Molecular Medicine, Aarhus University Hospital, Brendstrupgårdsvej 21, 8200 Aarhus N, Denmark, Telephone: +45 6133 9269, Telefax: +45 7846 2010, E-mail: [\*\*christian.trolle@clin.au.dk\*\*](mailto:christian.trolle@clin.au.dk)

ClinicalTrial.gov Identifier: NCT01678261 (<https://clinicaltrials.gov/ct2/show/NCT01678261> )

## Supplemental Figures

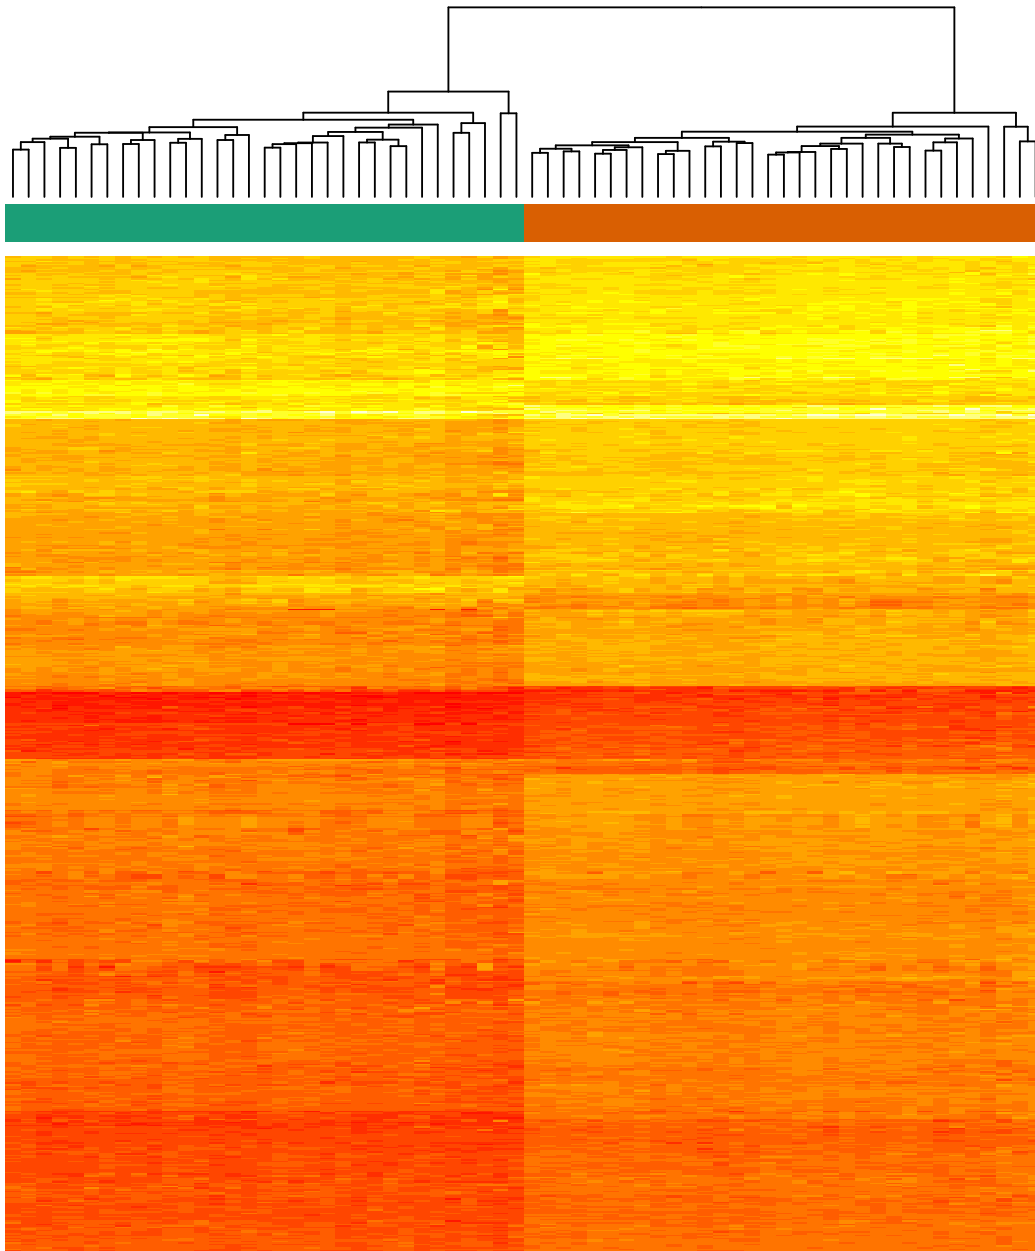

**Supplemental Figure 1.** Heatmap corresponding to one sample for each column and one DMP for each row using supervised hierarchical clustering testing for differences between groups with  $\text{FWER} < 0.05$  and absolute  $(\text{Delta-M-value}) > 1$  as cut-off. Red to yellow corresponds to relatively hypomethylated (red) to hypermethylated (yellow). Color bar above corresponds to groups, with green being Turner syndrome and orange Female controls. Dendrogram is displaced at the top.



**B.**

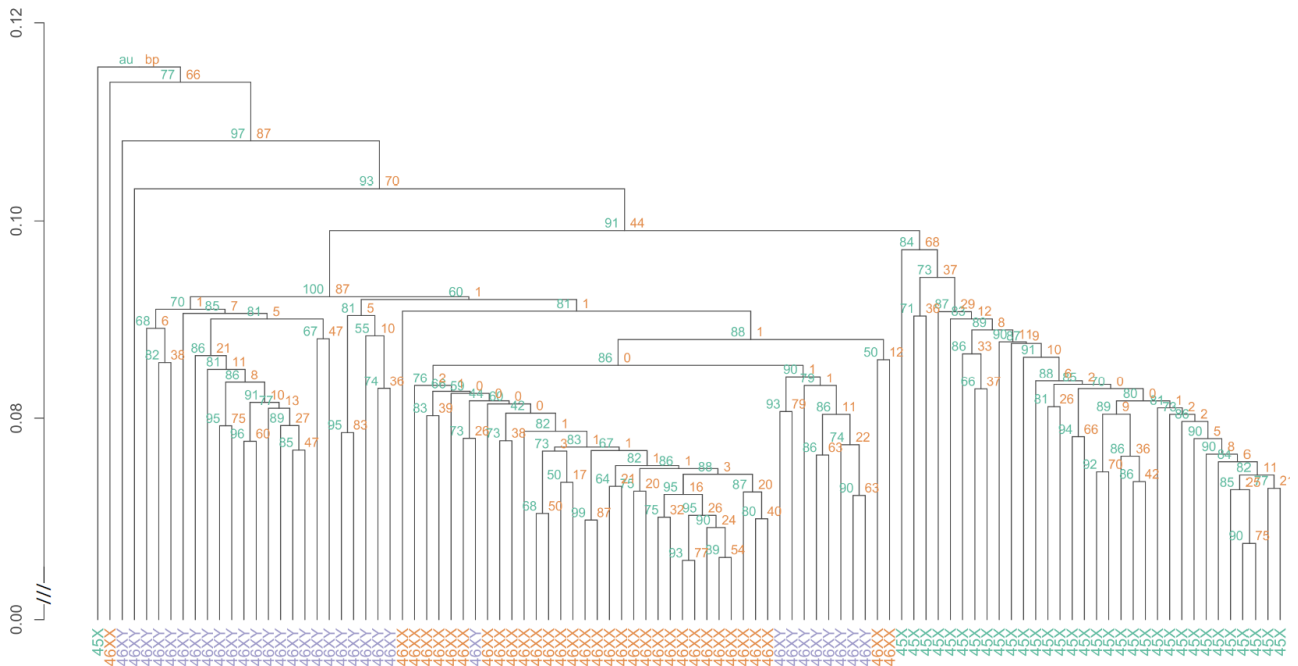

**Supplemental Figure 2.** Hierarchical cluster analysis to classify individuals according their M-values revealed a distinct Turner syndrome cluster. **Au** is the multiscale bootstrap resampling (bootstraps=1,000) based approximately unbiased p-value (given in red). **Bp** is the normal bootstrap resampling p-value (in green). Both au and bp represents the p-value of a cluster as a value between 0 and 100%. Clusters with an au larger than 95% are strongly supported by data. Labels indicate karyotype (Orange=46,XX; Green=45,X; Purple=46,XY). **A:** X-chromosome analysis, **B:** Autosome analysis.

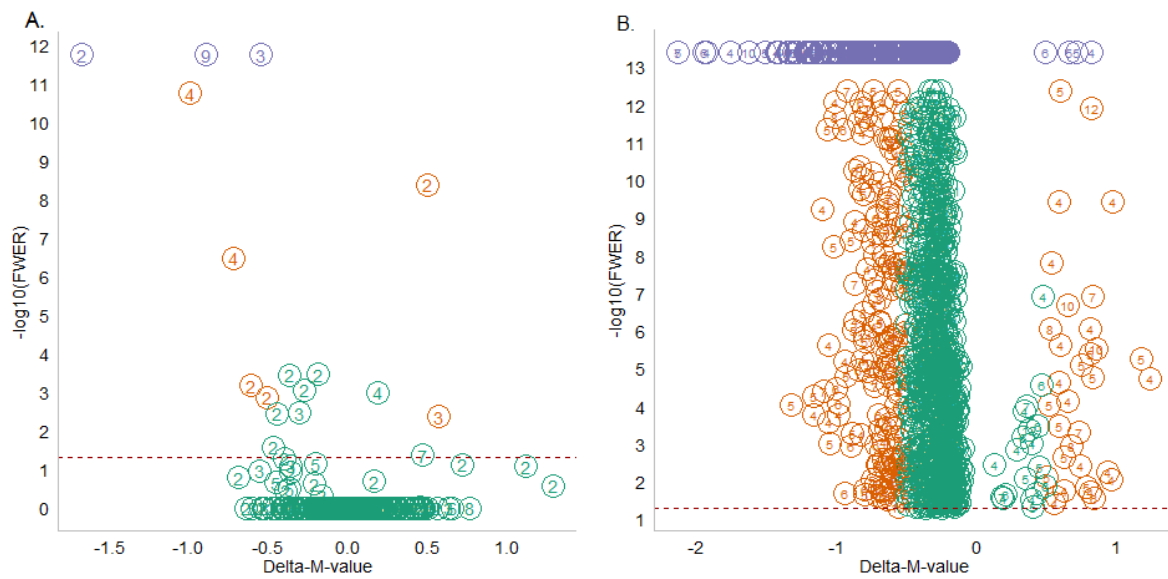

**Supplemental Figure 3.** Volcanoplot of Aclust derived DMRs.  $-\log_{10}(\text{FWER})$  against Delta-M-values. 45,X vs. 46,XX) illustrating a predominant 45,X hypomethylation. **A.** X-chromosome data based on the 45,X vs. 46,XY comparison. **B.** Autosome data based on the 45,X vs. 46,XX comparison. Orange: absolute (delta-M-value) $>0.5$ . Purple: FWER below limit of reporting as defined by Aclust. Digits: Number of CpGs in each DMR. Dashed red line: FWER=0.05.

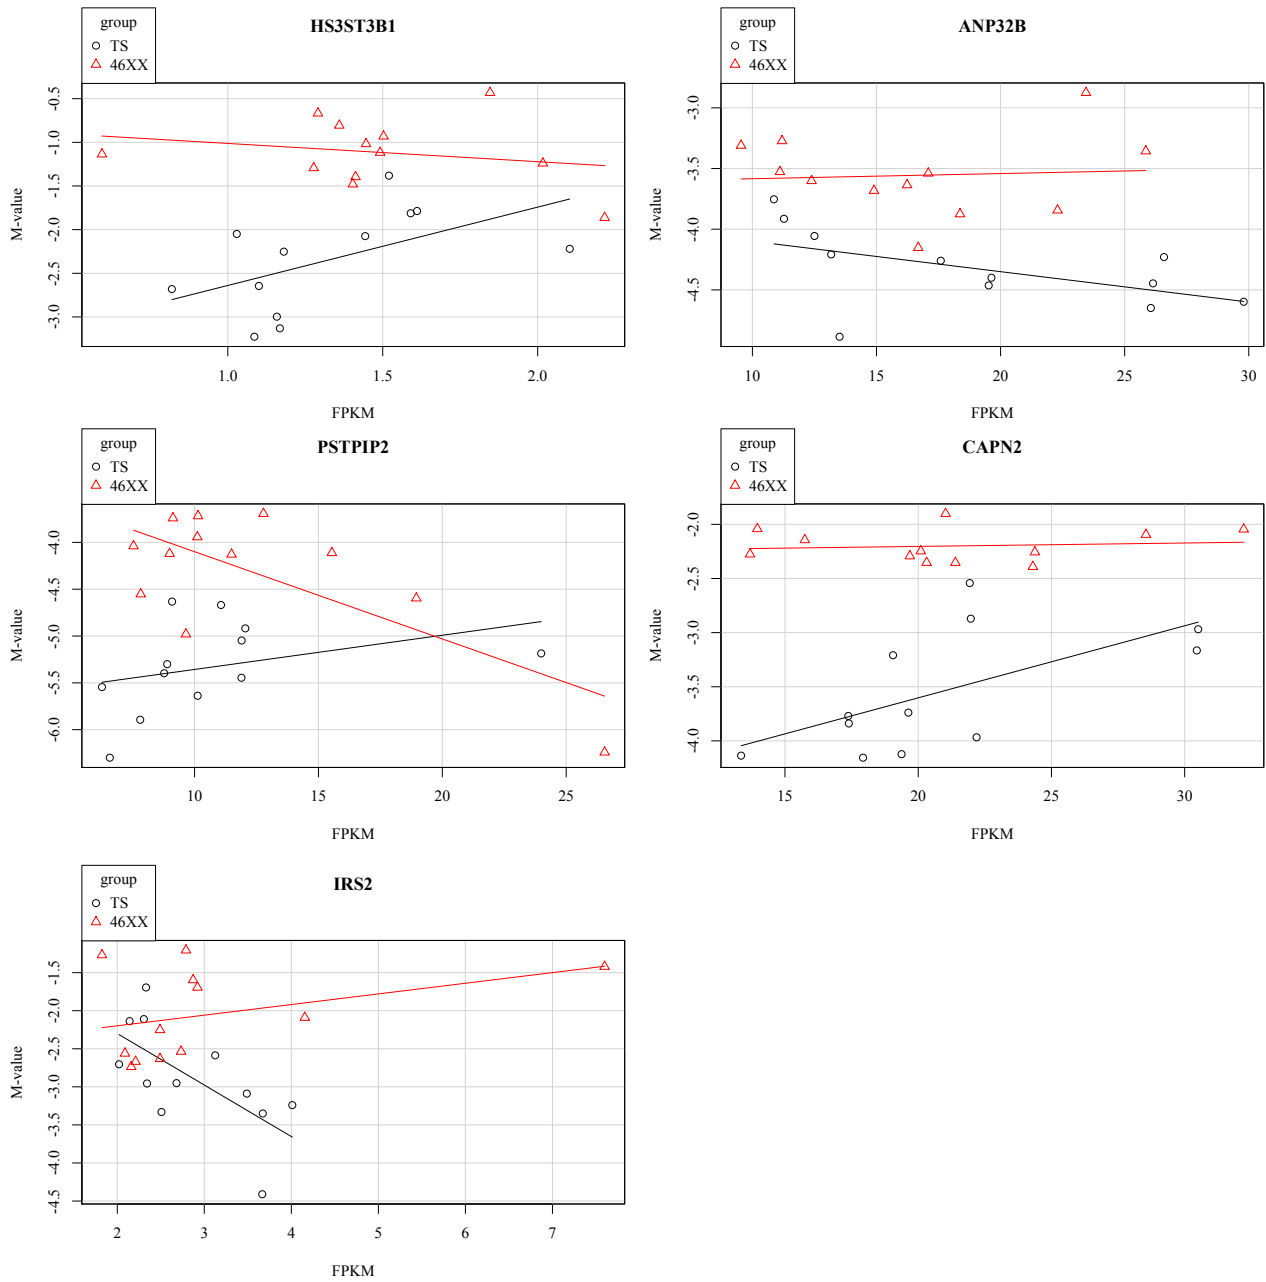

**Supplemental Figure 4.** DNA-methylation (M-value) plotted against expression (FPKM) corresponding to the five autosomal genes showing a significant correlation in the Turner syndrome group while also being differentially methylated when comparing Turner syndrome and female controls.

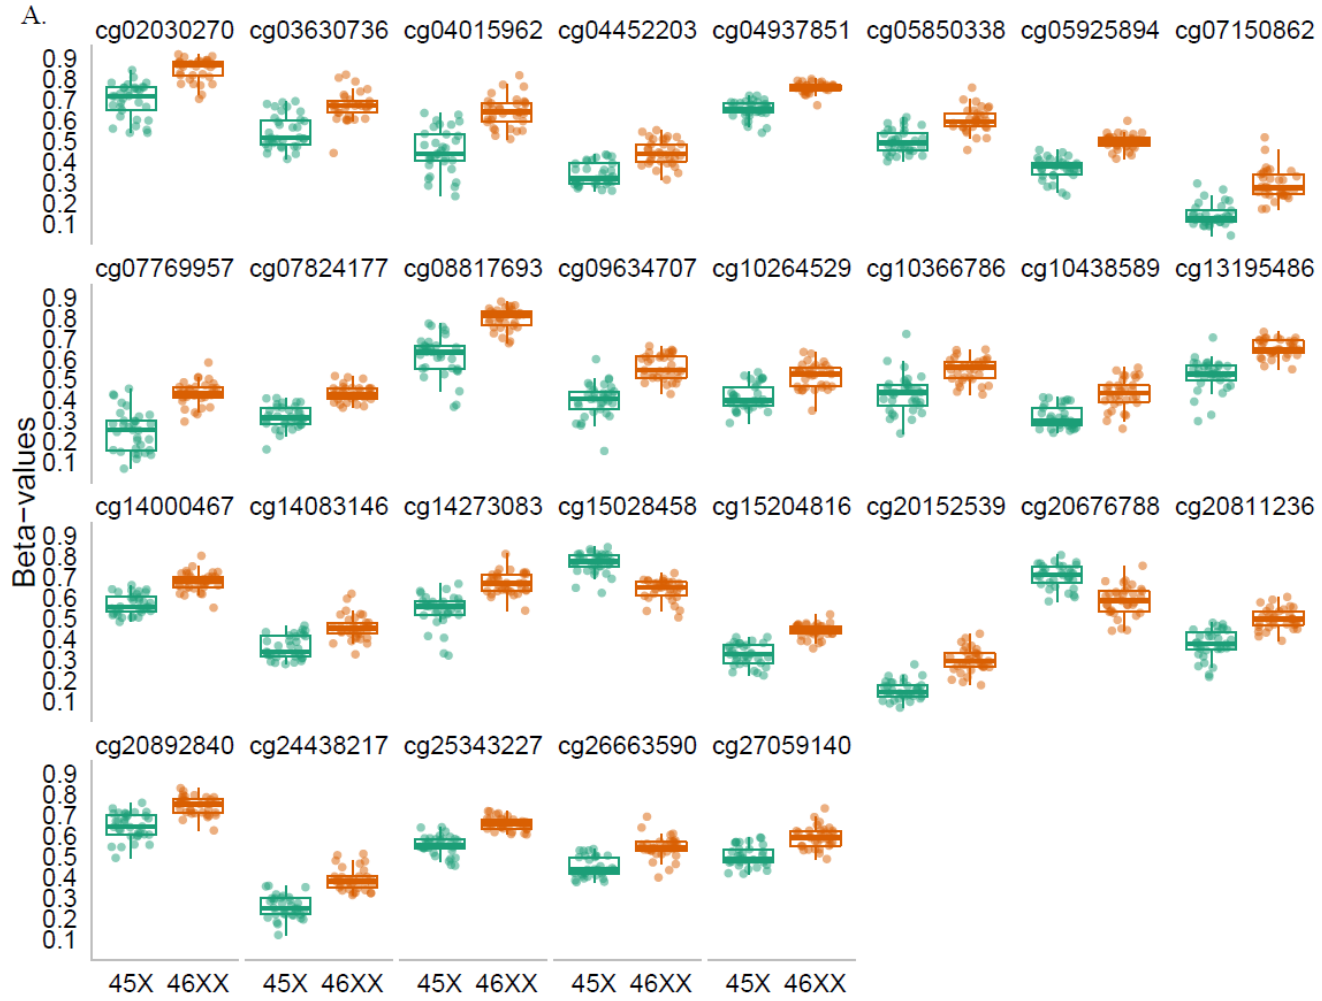

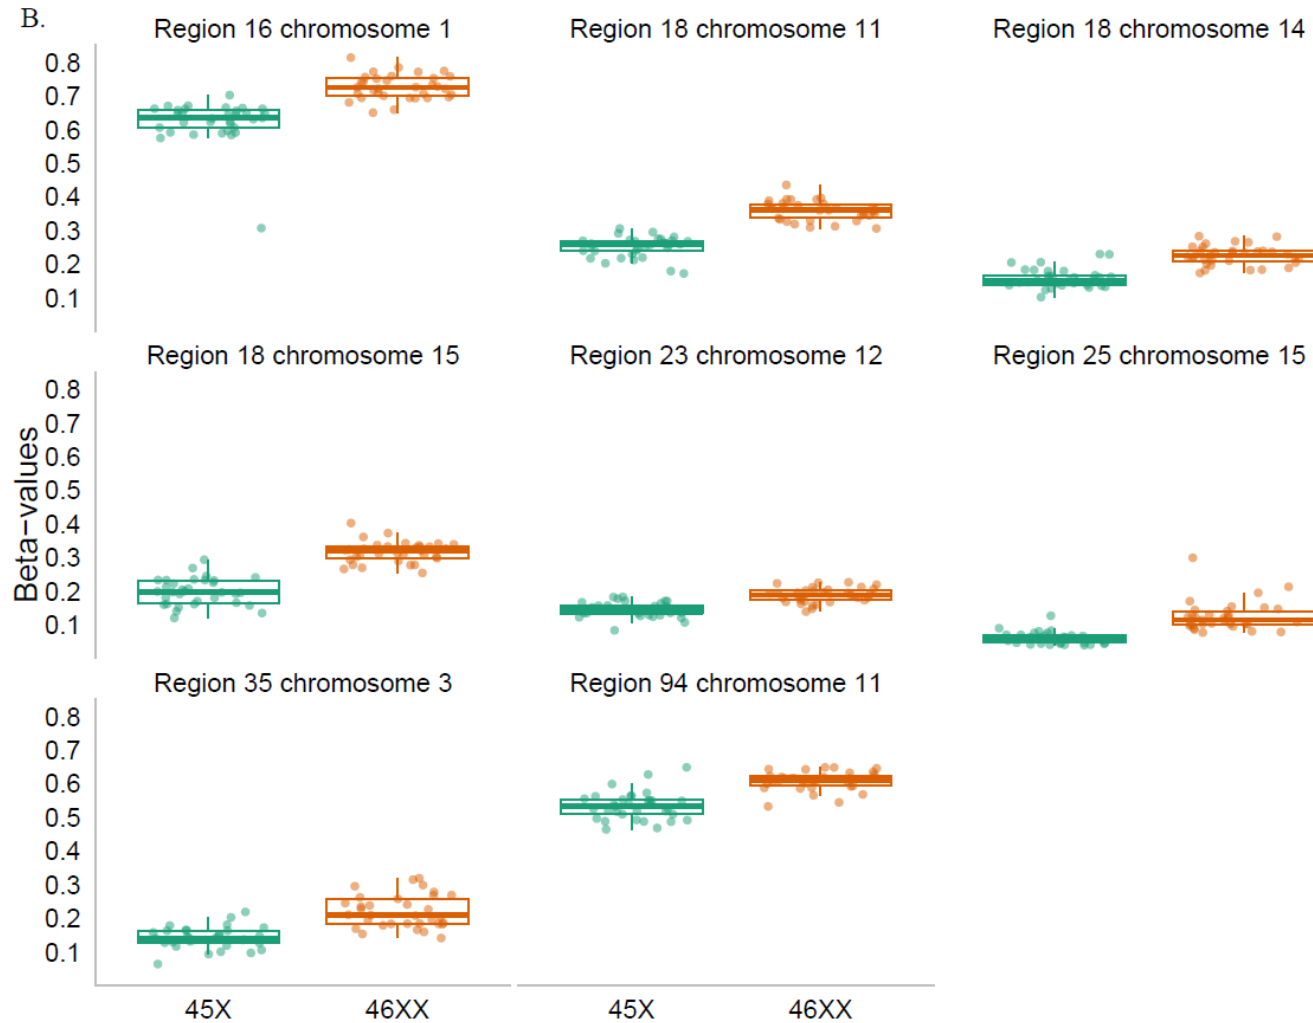

**Supplemental Figure 5. A.** Beta-values corresponding to DMPs with a FWER $<0.05$ , an absolute (Delta-Beta) $>0.1$ , and mapping to repetitive elements. 27 were hypomethylated and 2 hypermethylated in Turner syndrome compared to 46,XX controls. **B.** Beta-values corresponding to differentially methylated regions with a FWER $<0.05$  and an absolute (Delta-Beta) $>0.1$ .



A.

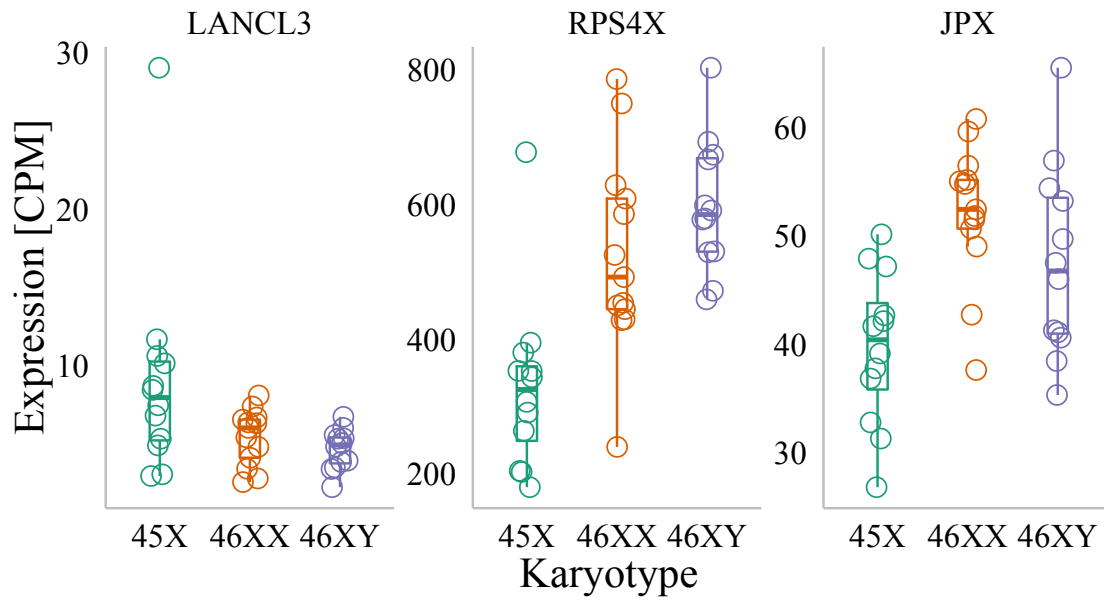

**Supplemental Figure 6.** Plot of expression values [Counts per million (CPM)] of “Escape” genes differentially expressed in both Turner syndrome comparisons with RPS4X and JPX showing the expected lower expression in Turner syndrome. Contra-intuitively, LANCL3 showed a slight increase.

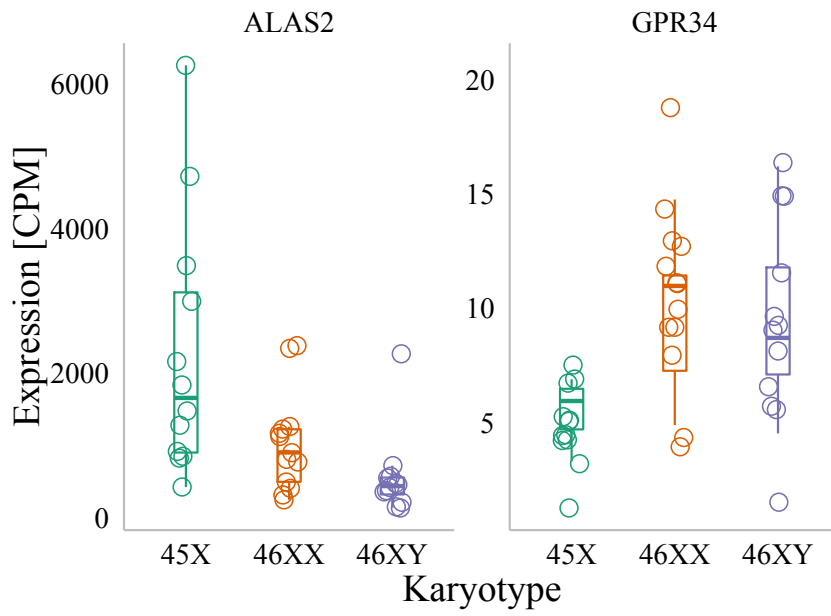

**Supplemental Figure 7.** Plot of expression values [Counts per million (CPM)] of “Inactivated” genes differentially expressed in both Turner syndrome comparisons.

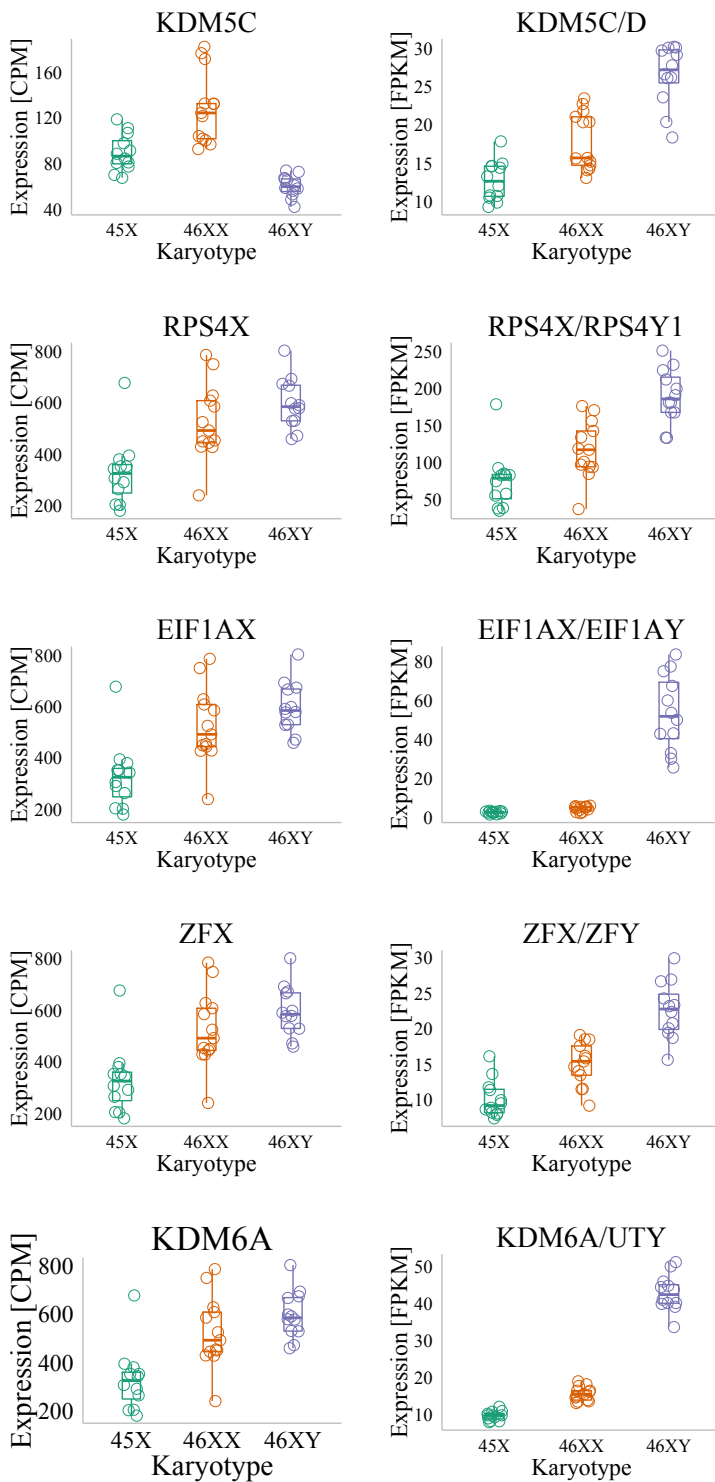

**Supplemental Figure 8.** Expression of X-Y gene pairs with overall and individual FDR<0.05.

Plots illustrate an increased 46,XY expression level when taking into account the Y-copy with no change in the relation between TS and 46,XX. **Left:** Counts per million (CPM) values according to karyotype (FDR<0.05). **Right:** FPKM values summed for X-Y pairs.



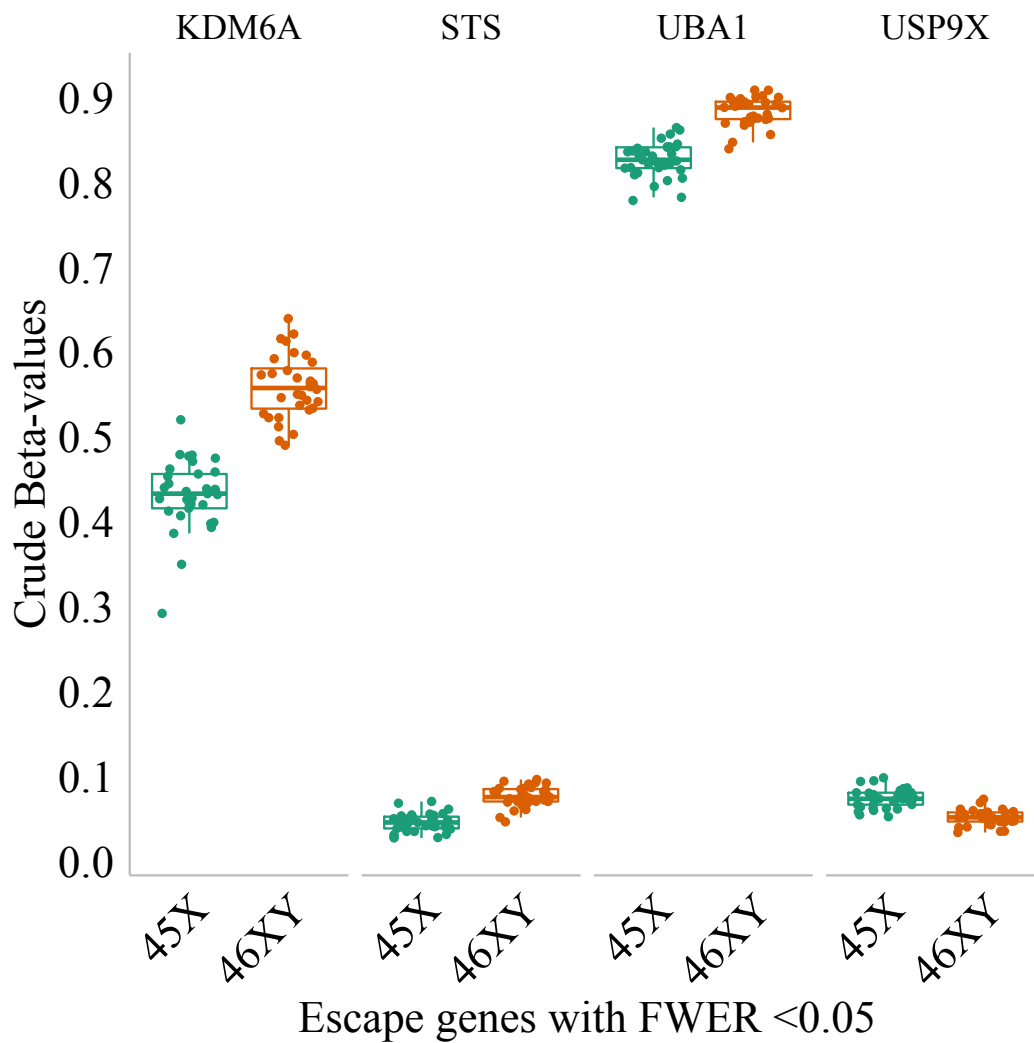

**Supplemental Figure 9.** Boxplot of crude beta-values of differentially methylated positions with a FWER<0.05 annotated to escape genes. The two most hypermethylated DMPs, KDM6A and UBA1 were located within the gene body and 3'UTR. STS and USP9X were within the proximal promotor.

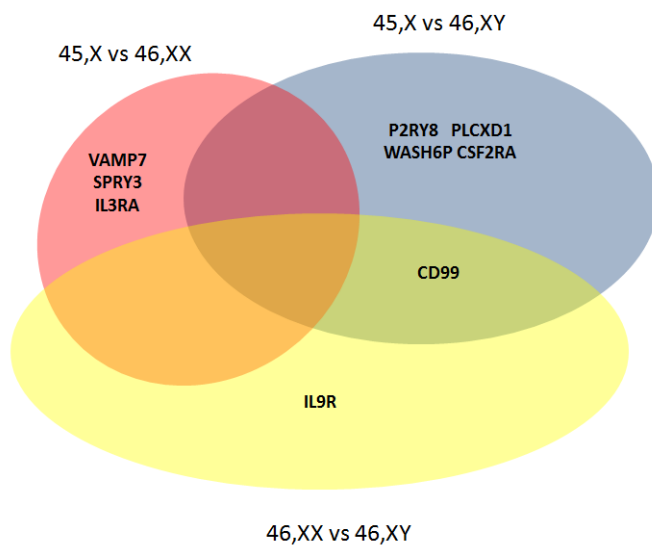

**Supplemental Figure 10.** Venn diagram listing differentially expressed genes of the pseudo-autosomal region with an overall FDR<0.05, individual FDR<0.05, and an absolute log fold change $\geq$ 0.3.

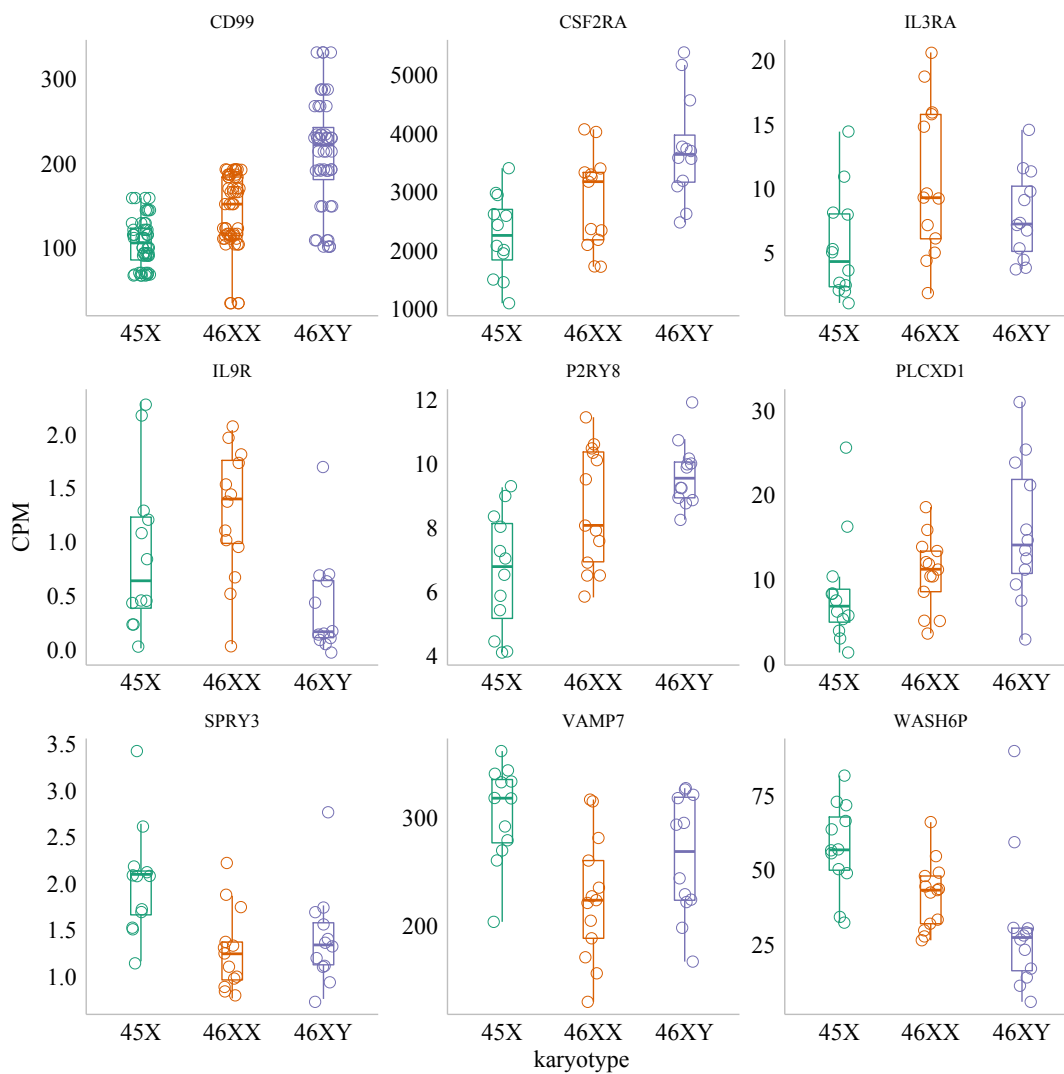

**Supplemental Figure 11.** Dotplots with overlaid boxplots illustrating the expression of differentially expressed genes of the pseudo-autosomal region with an overall FDR<0.05, individual FDR<0.05, and an absolute log fold change $\geq$ 0.3.

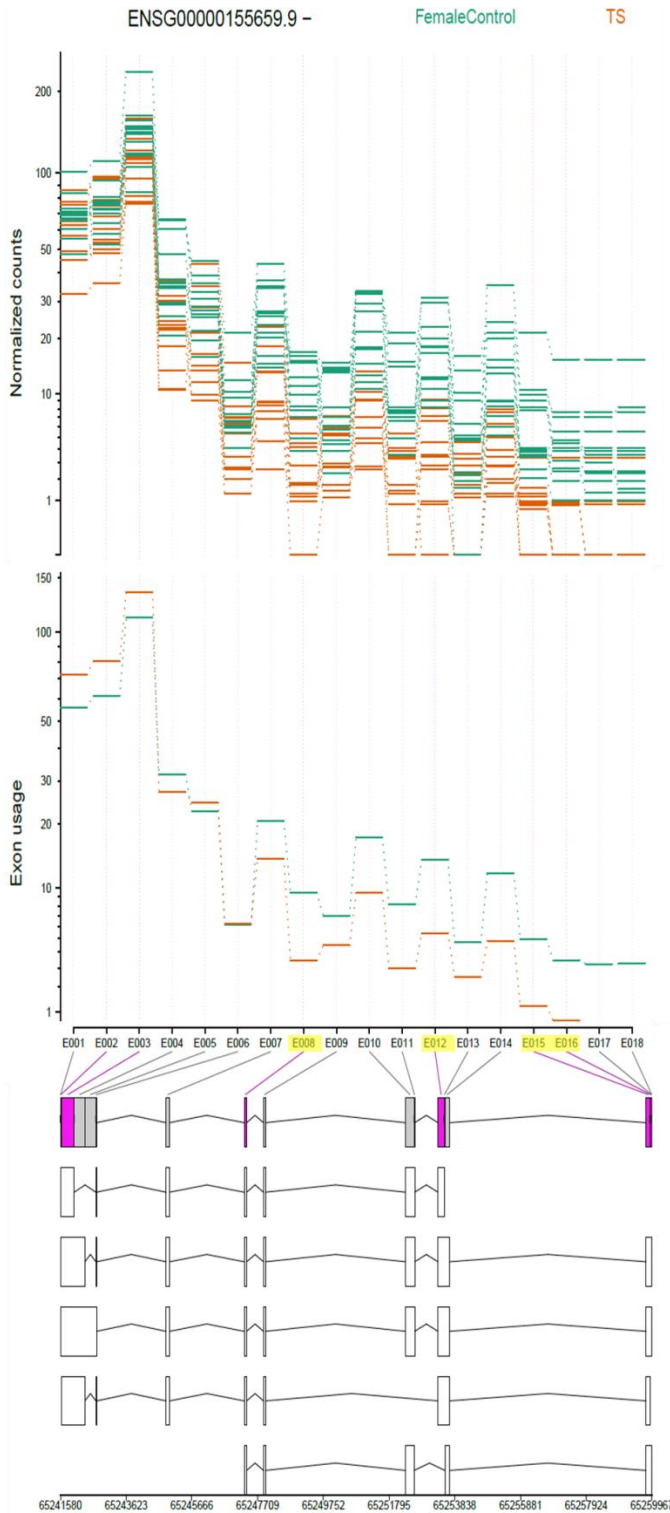

**Supplemental Figure 12.** Differential exon-usage shown for the *VSIG4* gene. **Top:** Normalized expression estimates. **Middle:** Normalized expression estimates per sample, per exon illustrating that the differential exon-usage is not merely a consequence of the overall down or up-regulation of



the *VSIG4* gene. **Bottom:** Transcript perspective. X-axis is Exons. Highlighted in yellow are exons with  $FDR < 0.05$ .

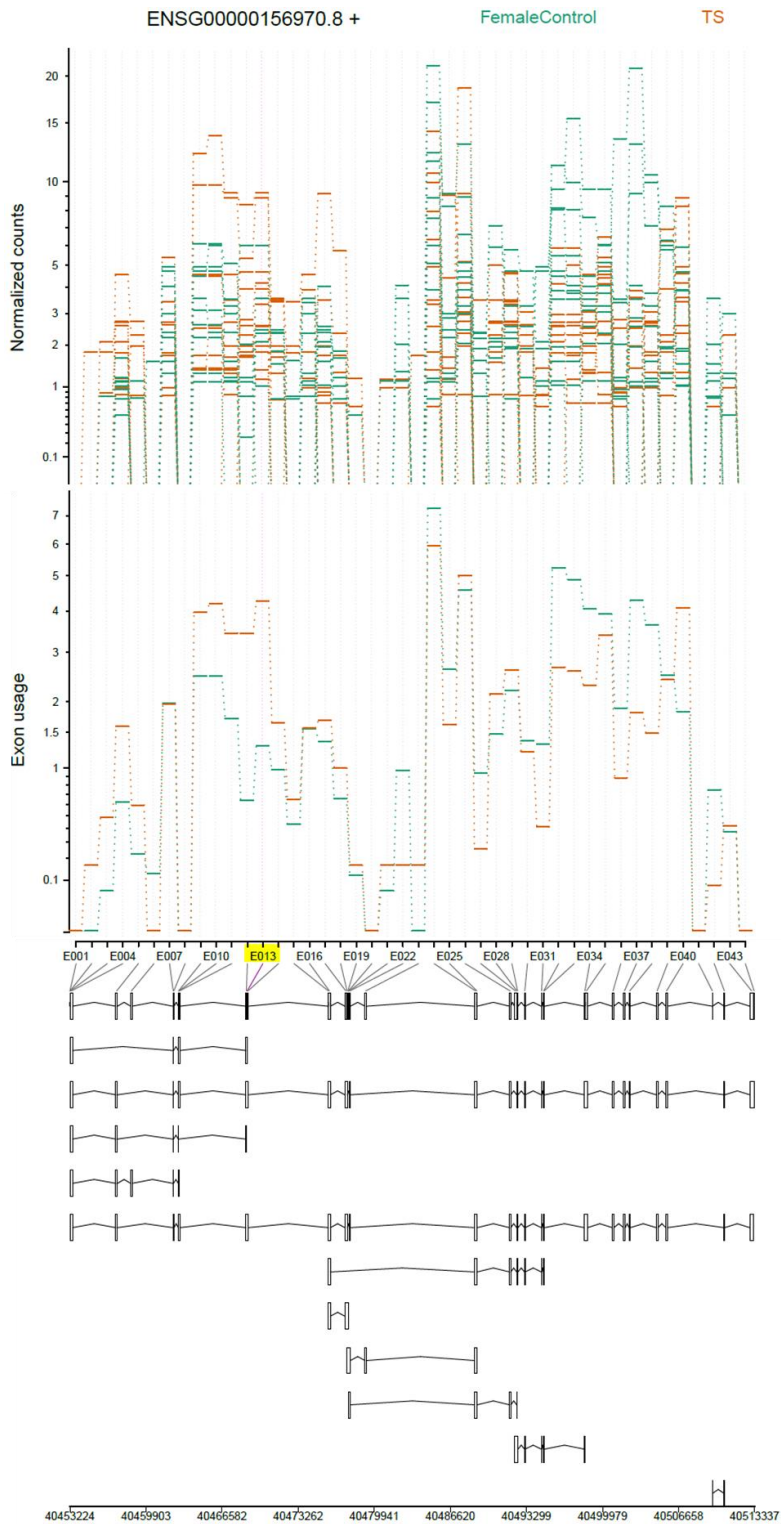

**Supplemental Figure 13.** Differential exon-usage shown for the BUB1B gene. **Top:** Normalized expression estimates. **Middle:** Normalized expression estimates per sample, per exon illustrating that the differential exon-usage is not merely a consequence of the overall down or up-regulation of

the BUB1B gene. **Bottom:** Transcript perspective. X-axis is Exons. Highlighted in yellow are exons with  $FDR < 0.05$ .

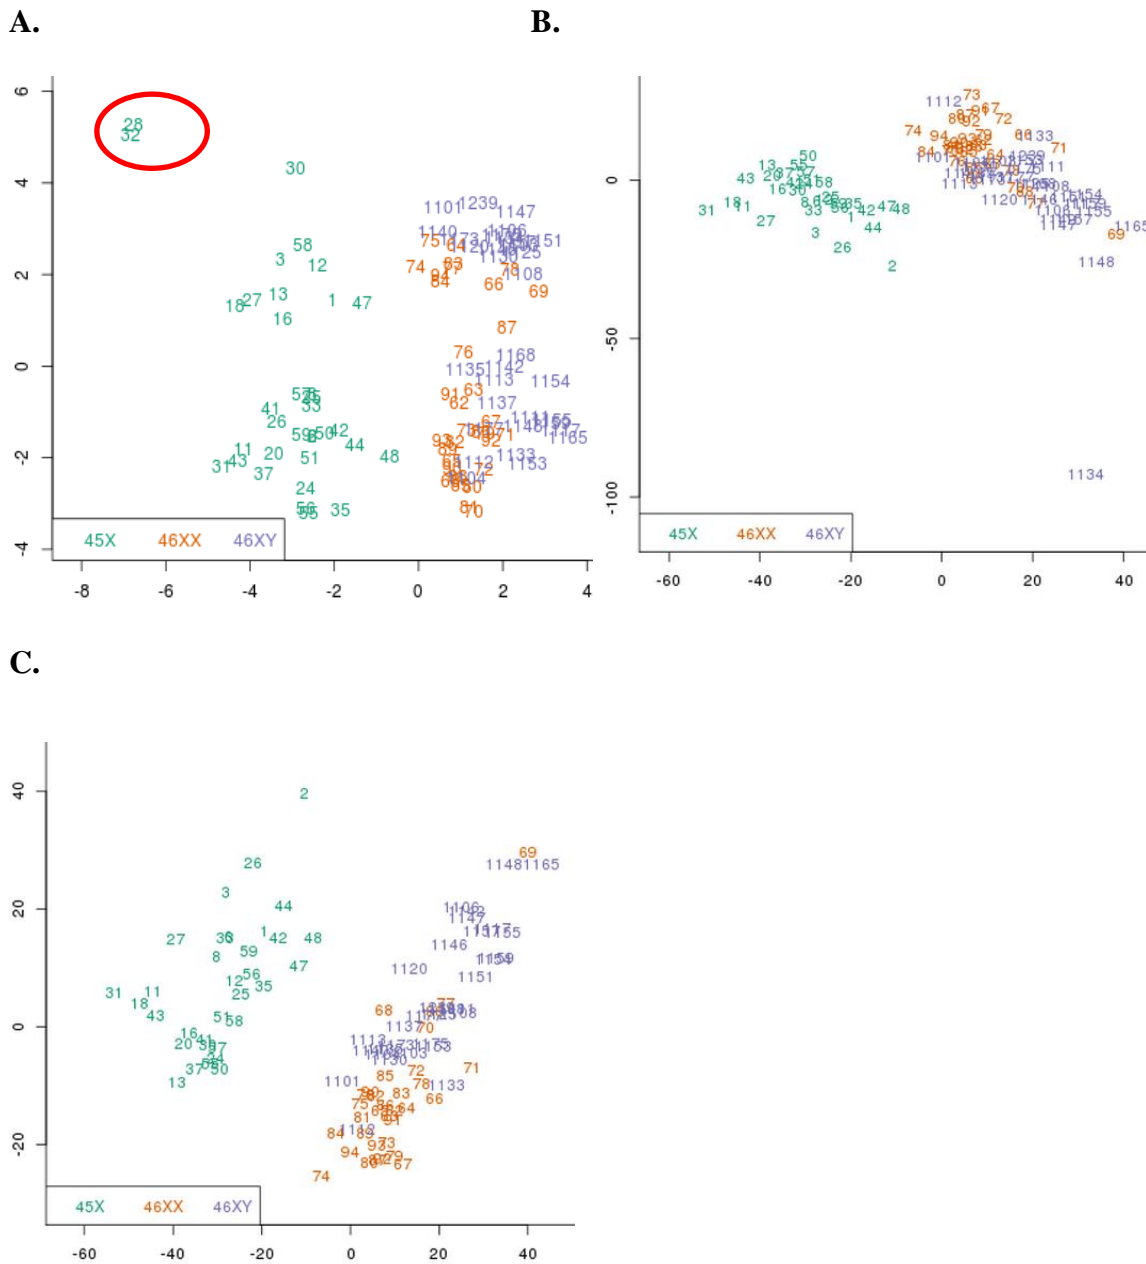

**Supplemental Figure 14.** Multi-dimensional scaling plot, based on M-values derived from the autosomes, showing a 2-d projection of the Euclidean distances calculated between samples using the 5000 most variable CpG positions. **Blue**=46,XY males, **Orange**=46,XX women, **Green**=45,X monosomy. A. Plot including all samples displaying the two outliers (sample 28 and 32) marked by the **red circle**. B. Same plot after exclusion of sample 28 and 32. C. Same plot after exclusion of sample 1134.



## Supplemental Tables

| Gene    | Chromosome | Function                                                                                                                                                                                                                                                     | Disease                                    | Link                 |
|---------|------------|--------------------------------------------------------------------------------------------------------------------------------------------------------------------------------------------------------------------------------------------------------------|--------------------------------------------|----------------------|
| ZNF532  | 18         | Zinc finger protein 532                                                                                                                                                                                                                                      |                                            |                      |
| IPCEF1  | 6          | Exchange factors 1                                                                                                                                                                                                                                           |                                            |                      |
| KLHL42  | 12         | Kelch-like family member 42                                                                                                                                                                                                                                  |                                            |                      |
| TRIM2   | 4          | TRIM2 functions as an E3 ubiquitin ligase that directs proteasome-mediated degradation of target proteins                                                                                                                                                    | Charcot-Marie-Tooth disease type 2R        | <a href="#">OMIM</a> |
| DOCK7   | 1          | Guanine nucleotide exchange factor for RAC1 and RAC3, plays a role in neurogenesis. Thought to play a critical role in normal distribution and function of dermal and follicular melanocytes                                                                 | Epileptic encephalopathy, early infantile  | <a href="#">OMIM</a> |
| CNR1    | 6          | Encode cadherin-like cell surface proteins that are expressed in neurons and are present at synaptic junctions                                                                                                                                               |                                            | <a href="#">OMIM</a> |
| MT2A    | 16         | Metallothionein II processed pseudogene                                                                                                                                                                                                                      |                                            | <a href="#">OMIM</a> |
| DSC2    | 18         | The cadherins are a superfamily of calcium-dependent glycoproteins that are cell adhesion molecules                                                                                                                                                          | Arrhythmogenic right ventricular dysplasia | <a href="#">OMIM</a> |
| PHLDA1  | 12         | T-cell death-associated gene 51 in mice models is induced by homocysteine, promotes detachment-mediated apoptosis, and contributes to the development of atherosclerosis in hyperhomocysteinemia.                                                            | Atherosclerosis                            | <a href="#">OMIM</a> |
| IGFBP3  | 7          | Major carrying protein for IGF1 and IGF2 modulator of IGF bioactivity and as a direct growth inhibitor in the extravascular tissue compartment                                                                                                               |                                            | <a href="#">OMIM</a> |
| PFKM    | 12         | Encodes the muscle isoform of phosphofructokinase (PFK). Catalyzes the irreversible conversion of fructose-6-phosphate to fructose-1,6-bisphosphate and is a key regulatory enzyme in glycolysis                                                             | Glycogen storage disease type VII          | <a href="#">OMIM</a> |
| SCOC    | 4          | Short coiled-coil protein                                                                                                                                                                                                                                    |                                            |                      |
| ZFYVE9  | 1          | SMAD anchor for receptor activation functions to recruit SMAD2 to the transforming growth factor-beta (TGFB) receptor by controlling the subcellular localization of SMAD2 and by interacting with the TGF- $\beta$ receptor complex                         |                                            | <a href="#">OMIM</a> |
| CD200R1 | 3          | Myeloid cell-specific surface glycoprotein that interacts with OX2                                                                                                                                                                                           |                                            | <a href="#">OMIM</a> |
| CXCL5   | 4          | Epithelial cell-derived neutrophil-activating peptide ENA78 is an inflammatory chemokine that is produced concomitantly with interleukin-8 (IL8) in response to stimulation with either interleukin-1 (IL1B) or tumor necrosis factor-alpha (TNF- $\alpha$ ) |                                            | <a href="#">OMIM</a> |
| RNASE2  | 14         | Eosinophil-derived neurotoxin                                                                                                                                                                                                                                |                                            | <a href="#">OMIM</a> |
| SOCS6   | 18         | Suppressor of cytokine signaling 6                                                                                                                                                                                                                           | CML? Human erythroleukemia?                | <a href="#">OMIM</a> |
| S100z   | 5          | Calcium-binding protein, zeta contains two calcium-binding EF-hands and exhibit cell-type specific expression patterns.                                                                                                                                      |                                            | <a href="#">OMIM</a> |

|            |    |                                                                                                                                                                                                                            |                                                                                                                           |                      |
|------------|----|----------------------------------------------------------------------------------------------------------------------------------------------------------------------------------------------------------------------------|---------------------------------------------------------------------------------------------------------------------------|----------------------|
| SLC22A5    | 5  | Organic cation transporter 2 is a physiologically important, high affinity carnitine transporter that shows significant sodium ion dependence                                                                              | Inflammatory bowel disease. Carnitine deficiency, systemic primary                                                        | <a href="#">OMIM</a> |
| C5orf42    | 5  | Chromosome 5 open reading frame 42                                                                                                                                                                                         | Joubert syndrome 17, Orofaciodigital syndrome VI                                                                          | <a href="#">OMIM</a> |
| GSTM2      | 1  | This enzyme catalyzes the reaction of glutathione with a wide variety of organic compounds to form thioethers, a reaction that is sometimes a first step in a detoxification process leading to mercapturic acid formation |                                                                                                                           | <a href="#">OMIM</a> |
| AC009299.3 | 2  |                                                                                                                                                                                                                            |                                                                                                                           |                      |
| HCG11      | 6  | HLA complex group 11 (non-protein coding)                                                                                                                                                                                  |                                                                                                                           | <a href="#">LINK</a> |
| CHCHD10    | 22 | CHCHD10 is a relatively small protein of the mitochondrial intermembrane space that is enriched at cristae junctions. It is predicted to be involved in oxidative phosphorylation or in maintenance of cristae morphology  | Amyotrophic Lateral Sclerosis-2, Spinal Muscular Atrophy, Jokela Type, Autosomal Dominant Isolated Mitochondrial Myopathy | <a href="#">OMIM</a> |
| OVCH1-AS1  | 12 | OVCH1 antisense RNA 1                                                                                                                                                                                                      |                                                                                                                           | <a href="#">LINK</a> |
| ADGRA3     | 4  | G protein-coupled receptor 125                                                                                                                                                                                             |                                                                                                                           | <a href="#">OMIM</a> |

**Supplemental Table 1.** Descriptives on the 26 differential expressed autosomal genes common to both Turner syndrome comparisons.

| <b>Gene</b> | <b>CGI position</b> | <b>Chromosome</b> | <b>rho</b> | <b>P-Value</b> |
|-------------|---------------------|-------------------|------------|----------------|
| HS3ST3B1    | Orphan              | 17                | 0.59       | 0.049          |
| ANP32B      | Orphan              | 9                 | -0.64      | 0.028          |
| PSTPIP2     | Orphan              | 18                | 0.60       | 0.043          |
| CAPN2       | Orphan              | 1                 | 0.61       | 0.040          |
| IRS2        | Orphan              | 13                | -0.73      | 0.010          |

**Supplemental Table 2.** Correlation between autosomal gene expression and the autosomal DNA-methylation level at CGIs defined as orphan (within of between characterized transcription units) in Turner syndrome. Only differentially methylated positions (FWER<0.05) from the Turner syndrome versus female controls were included in the analysis.



| Gene         | XCI status                     | FC 45X vs 46XX | FC 45X vs 46XY | Function                                                                                                                                                                                            | Disease                                                                                                                                                                                                                                                                                                                 | Link                 |
|--------------|--------------------------------|----------------|----------------|-----------------------------------------------------------------------------------------------------------------------------------------------------------------------------------------------------|-------------------------------------------------------------------------------------------------------------------------------------------------------------------------------------------------------------------------------------------------------------------------------------------------------------------------|----------------------|
| LANCL3       | Escape                         | 1.67           | 1.95           |                                                                                                                                                                                                     |                                                                                                                                                                                                                                                                                                                         |                      |
| RPS4X        | Escape                         | 0.63           | 0.55           | Encodes ribosomal protein S4                                                                                                                                                                        | XY gonadal dysgenesis patients with somatic features of the Turner syndrome have been found to have deletion of this portion of Yp. However, patients with 46,Xi(Xq) karyotype, i.e., isochromosome Xq, cannot be differentiated phenotypically from 45,X Turner syndrome patients but carry 3 copies of the RPS4X gene | <a href="#">OMIM</a> |
| <i>ALAS2</i> | Inactivated                    | 2.19           | 4.03           | Catalyzes the first committed step of heme biosynthesis                                                                                                                                             | Hereditary sideroblastic anemia                                                                                                                                                                                                                                                                                         | <a href="#">OMIM</a> |
| <i>GPR34</i> | Inactivated                    | 0.59           | 0.62           | G protein-coupled receptor                                                                                                                                                                          |                                                                                                                                                                                                                                                                                                                         | <a href="#">OMIM</a> |
| JPX          | Possibly escaping inactivation | 0.76           | 0.83           | Proposed that <i>XIST</i> is controlled by 2 parallel RNA switches: TSIX, which represses <i>XIST</i> on the active X-chromosome, and JPX, which activates <i>XIST</i> on the inactive X-chromosome | Deletion or knockdown of Jpx in female ES cells caused severe abnormalities during ES cell differentiation, including reduced Xist expression, defects in cell outgrowth and attachment, and massive cell death.                                                                                                        | <a href="#">OMIM</a> |

**Supplemental Table 3.** Characteristics corresponding to genes differentially expressed when comparing TS to female controls as well as male controls. XCI=The known X-chromosome inactivation status of the gene. FC=Fold change with the value 1 corresponding to no change.

| X_Ensembl              | HumanXCIEscape | X_hgnc_symbol | Y_Ensembl              | Y_Gene        | X.Y.Pair   | Gene_Ensembl  |
|------------------------|----------------|---------------|------------------------|---------------|------------|---------------|
| ENSG00000101825        | Escaper        | MXRA5         | ENSG00000235649        | MXRA5Y        | Yes        | PseudoOnY     |
| <b>ENSG00000183943</b> | <b>Escaper</b> | <b>PRKX</b>   | <b>ENSG00000099725</b> | <b>PRKY</b>   | <b>Yes</b> | <b>PRKY</b>   |
| ENSG00000146938        | Escaper        | NLGN4X        | ENSG00000165246        | NLGN4Y        | Yes        | NLGN4X        |
| ENSG00000101849        | Escaper        | TBL1X         | ENSG00000092377        | TBL1Y         | Yes        | TBL1Y         |
| ENSG00000125363        | No Data        | AMELX         | ENSG00000099721        | AMELY         | Yes        | AMELX         |
| ENSG00000205542        | No Data        | TMSB4X        | ENSG00000154620        | TMSB4Y        | Yes        | TMSB4Y        |
| ENSG00000046651        | Escaper        | OFD1          |                        | OFD1Y         | Yes        | Missing       |
| ENSG00000169249        | No Data        | ZRSR2         |                        | ZRSR2Y        | Yes        | Missing       |
| ENSG00000086712        | Escaper        | TXLNG         | ENSG00000131002        | TXLNGY        | Yes        | Missing       |
| <b>ENSG00000173674</b> | <b>Escaper</b> | <b>EIF1AX</b> | <b>ENSG00000198692</b> | <b>EIF1AY</b> | <b>Yes</b> | <b>EIF1AY</b> |
| ENSG00000130741        | Escaper        | EIF2S3        |                        | EIF2S3Y       | Yes        | Missing       |
| <b>ENSG00000005889</b> | <b>Escaper</b> | <b>ZFX</b>    | <b>ENSG00000067646</b> | <b>ZFY</b>    | <b>Yes</b> | <b>ZFY</b>    |
| ENSG00000124486        | Escaper        | USP9X         | ENSG00000114374        | USP9Y         | Yes        | USP9Y         |
| ENSG00000215301        | Escaper        | DDX3X         | ENSG00000067048        | DDX3Y         | Yes        | DDX3Y         |
| <b>ENSG00000147050</b> | <b>Escaper</b> | <b>KDM6A</b>  | <b>ENSG00000183878</b> | <b>UTY</b>    | <b>Yes</b> | <b>UTY</b>    |
| ENSG00000182872        | Nonescaper     | RBM10         |                        | RBM10Y        | Yes        | Missing       |
| ENSG00000130985        | Escaper        | UBA1          |                        | UBE1Y         | Yes        | Missing       |
| ENSG00000068308        | Nonescaper     | OTUD5         |                        | OTUD5Y        | Yes        | Missing       |
| ENSG00000184205        | Nonescaper     | TSPYL2        |                        | TSPY          | Yes        | Missing       |
| <b>ENSG00000126012</b> | <b>Escaper</b> | <b>KDM5C</b>  | <b>ENSG00000012817</b> | <b>KDM5D</b>  | <b>Yes</b> | <b>KDM5D</b>  |
| ENSG00000086758        | Escaper        | HUWE1         |                        | HUWE1Y        | Yes        | Missing       |
| <b>ENSG00000198034</b> | <b>Escaper</b> | <b>RPS4X</b>  | <b>ENSG00000129824</b> | <b>RPS4Y1</b> | <b>Yes</b> | <b>RPS4Y1</b> |
| ENSG00000085224        | Nonescaper     | ATRX          |                        | ATRY          | Yes        | Missing       |
| ENSG00000125676        | Nonescaper     | THOC2         |                        | THOC2Y        | Yes        | Missing       |
| ENSG00000156531        | Escaper        | PHF6          |                        | PHF6Y         | Yes        | Missing       |
| ENSG00000156504        | Escaper        | FAM122B       |                        | FAM122BY      | Yes        | Missing       |
| ENSG00000147274        | Nonescaper     | RBMX          | ENSG00000234414        | RBMX1A1       | Yes        | RBMX1A1       |
| ENSG00000134595        | No Data        | SOX3          | ENSG00000184895        | SRY           | Yes        | SRY           |
| ENSG00000171116        | No Data        | HSFX1         |                        | HSFY          | Yes        | Missing       |
| ENSG00000029993        | Nonescaper     | HMGB3         |                        | HMGB3Y        | Yes        | Missing       |
| ENSG00000172534        | Escaper        | HCFC1         |                        | HCFC1Y        | Yes        | Missing       |
| ENSG00000169057        | Nonescaper     | MECP2         |                        | MECP2Y        | Yes        | Missing       |
| ENSG00000147403        | Nonescaper     | RPL10         |                        | RPL10Y        | Yes        | Missing       |

**Supplemental Table 4.** Adapted from Bellott *et al*<sup>11</sup>. The pseudo-autosomal region is excluded.

Column indicating if the Y-homolog has a known ensemble gene id and official gene symbol has been added as Y\_Ensembl and Gene\_Ensembl. Rows in bold are genes significant in the 45,X vs. 46,XX comparison.

| Term                                            | Count | %   | Fisher's Exact | TS comorbidity                |
|-------------------------------------------------|-------|-----|----------------|-------------------------------|
| Insulin; glucose; polycystic ovary syndrome     | 3     | 0.6 | 4.60E-04       | T2D, MS                       |
| Disc degeneration, lumbar spine                 | 2     | 0.4 | 8.50E-04       | Scoliosis                     |
| Sciatica                                        | 2     | 0.4 | 8.50E-04       | Scoliosis                     |
| Polycystic ovarian syndrome; insulin resistance | 2     | 0.4 | 8.50E-04       | T2D, MS                       |
| Intervertebral disc disease                     | 2     | 0.4 | 8.50E-04       |                               |
| Insulin secretion                               | 2     | 0.4 | 8.50E-04       | T2D, MS                       |
| Insulin; blood pressure, arterial               | 2     | 0.4 | 4.90E-03       | T2D, MS, HT                   |
| Disc degeneration                               | 2     | 0.4 | 8.10E-03       | Scoliosis                     |
| Body mass; birth weight; height                 | 2     | 0.4 | 8.10E-03       | Obesity, SS                   |
| Colon cancer rectal cancer                      | 2     | 0.4 | 1.20E-02       | Colon cancer                  |
| Multiple epiphyseal dysplasia                   | 2     | 0.4 | 1.60E-02       | Madelung deformity and others |
| Insulin; obesity                                | 2     | 0.4 | 2.10E-02       | T2D, MS                       |
| Disc degeneration, intervertebral               | 2     | 0.4 | 2.10E-02       | Scoliosis                     |
| Diabetes, type 2; liver disease                 | 4     | 0.8 | 2.40E-02       | T2D, ELE                      |
| Insulin resistance                              | 3     | 0.6 | 2.80E-02       | T2D, MS                       |
| Insulin                                         | 4     | 0.8 | 3.30E-02       | T2D, MS                       |
| Rhinitis                                        | 2     | 0.4 | 4.70E-02       |                               |
| Hearing loss, sensorineural non-syndromic       | 2     | 0.4 | 4.70E-02       | Impaired Hearing              |

**Supplemental Table 5.** Gene-centric modular analysis using DAVID entering autosomal DMPs

reaching an FWER p-value <0.05 and absolute (delta-M-value)>0.5. Output from the Genetic Association Database. Last column is comorbidity know to be increased in TS<sup>29</sup>, which falls within each category. MS=Metabolic syndrome, T2D=Type 2 diabetes, HT=Hypertension, SS=Short stature, ELE=Elevated liver enzymes, TS=Turner syndrome.

| Term                                                 | Fisher's | CNRI | CXCL5 | RNASE2 | ADGRA3 | DOCK7 | IGFBP3 | LRRN3 | SOC6 | ZFYVE9 | MT2A | PFKM | SLC22A5 |
|------------------------------------------------------|----------|------|-------|--------|--------|-------|--------|-------|------|--------|------|------|---------|
| Behavior                                             | 0.005    | ■    | ■     | ■      |        |       |        |       |      |        |      |      |         |
| G-protein coupled receptor protein signaling pathway | 0.005    | ■    |       | ■      | ■      |       |        |       |      |        |      |      |         |
| Chemotaxis                                           | 0.009    |      | ■     | ■      |        |       |        |       |      |        |      |      |         |
| Taxis                                                | 0.009    |      | ■     | ■      |        |       |        |       |      |        |      |      |         |
| Regulation of protein amino acid phosphorylation     | 0.018    |      |       |        |        | ■     | ■      |       |      |        |      |      |         |
| Locomotory behavior                                  | 0.021    |      | ■     | ■      |        |       |        |       |      |        |      |      |         |
| Negative regulation of signal transduction           | 0.028    |      |       |        |        |       | ■      |       | ■    |        |      |      |         |
| Cell surface receptor linked signal transduction     | 0.029    | ■    | ■     |        | ■      |       | ■      |       |      | ■      |      |      |         |
| Negative regulation of cell communication            | 0.032    |      |       |        |        |       | ■      |       | ■    |        |      |      |         |
| Homeostatic process                                  | 0.040    |      |       |        |        |       |        |       |      |        | ■    | ■    | ■       |
| Regulation of growth                                 | 0.048    |      |       |        |        |       | ■      |       | ■    |        |      |      |         |

**Supplemental Table 6.** GO-terms from the Functional Pathway Analysis using DAVID achieved

by submitting the 33 differentially expressed autosomal genes common to the TS vs. female controls comparison. Only results reaching a Fisher's exact test < 0.05 are listed.

| GO Biological Process term                                           | Binomial test |     | Hypergeometric test |     |
|----------------------------------------------------------------------|---------------|-----|---------------------|-----|
|                                                                      | FDR           | FE  | FDR                 | FE  |
| Chromosome organization                                              | 5.3E-8        | 2.1 | 4.8e-2              | 1.5 |
| Embryonic organ development                                          | 8.3e-8        | 2.3 | 6.5e-2              | 1.9 |
| Negative regulation of transcription from RNA polymerase II promoter | 8.4e-8        | 2.1 | 4.5e-2              | 1.6 |
| Skeletal system development                                          | 9.7e-8        | 2.3 | 3.7e-2              | 1.8 |
| Regionalization                                                      | 2.3e-7        | 2.5 | 4.0e-2              | 2.0 |
| Embryo development ending in birth or egg hatching                   | 7.7e-7        | 2.0 | 3.9e-2              | 1.6 |
| Chordate embryonic development                                       | 1.2e-6        | 2.0 | 4.7e-2              | 1.6 |
| Embryonic skeletal system morphogenesis                              | 3.9e-4        | 3.4 | 3.8e-2              | 2.9 |
| Embryonic skeletal system development                                | 8.0e-4        | 2.8 | 3.3e-2              | 2.6 |

**Supplemental Table 7.** Statistical significant gene ontology (GO) terms found using GREAT.

Autosomal DMRs with an FWER<0.05 and absolute (delta-M-value)>0.5 were given as input.

Association rule: Basal extension: 10kb upstream, 1 kb downstream, 150kb max extension and

allowing for curated regulatory domains. FDR=False discovery rate. FE=Fold enrichment.

| Chr | Gene    | Function                                                                                                                                                                                                                                            | Disease                                                                                            |
|-----|---------|-----------------------------------------------------------------------------------------------------------------------------------------------------------------------------------------------------------------------------------------------------|----------------------------------------------------------------------------------------------------|
| 12  | HAL     | Histidase is a cytosolic enzyme catalyzing the first reaction in histidine catabolism                                                                                                                                                               | Histidinemia                                                                                       |
| 12  | ACSS3   | Acyl-CoA synthetase short chain family member 3. Plays a role for the incorporation of fatty acids into membranes and signaling molecules and have roles in energy storage and metabolism                                                           |                                                                                                    |
| 1   | STIL    | Contains a putative nuclear localization signal and a cysteine-terminal domain similar to the C-terminal domain of TGF-beta. Expression of the STIL gene in human fetal brain and suggested that it may be involved in neuronal cell proliferation. | Microcephaly                                                                                       |
| 22  | TUBGCP6 | Codes for GCP6 a core component of centrosomes                                                                                                                                                                                                      | microcephaly and chorioretinopathy                                                                 |
| 2   | SPAG16  | Sperm-associated antigen16. SPAG16 encodes 2 major proteins that associate with the axoneme of sperm tail and the nucleus of postmeiotic germ cells, respectively                                                                                   |                                                                                                    |
| 15  | BUB1B   | Plays a critical role in regulating the spindle-assembly checkpoint                                                                                                                                                                                 | Premature Chromatid Separation Trait and Mosaic Variegated Aneuploidy Syndrome. Colorectal cancer. |
| 4   | RGS12   | Regulator of G-Protein signaling                                                                                                                                                                                                                    |                                                                                                    |
| 16  | SNTB2   | Syntrophin beta-2. Abundant in heart and skeletal muscle                                                                                                                                                                                            |                                                                                                    |

**Supplemental Table 8.** Autosomal genes showing differential exon-usage. Chr=Chromosome.

Gene=HGNC gene symbol.

## References

- 1 Bellott, D. W. *et al.* Mammalian Y chromosomes retain widely expressed dosage-sensitive regulators. *Nature* **508**, 494-499, doi:10.1038/nature13206 (2014).
- 2 Gravholt, C. H., Juul, S., Naeraa, R. W. & Hansen, J. Morbidity in Turner syndrome. *J Clin.Epidemiol.* **51**, 147-158 (1998).
